# Supplementary material for: l -Carnosine loaded on carboxymethyl cellulose hydrogels for promoting wound healing
Source: Royal Society of Chemistry journal article supplement (doi:10.1039/d4ra00135d), 2024-01-01
Supplement: d4ra00135d1.pdf [file d4ra00135d1.pdf]

## Supporting Information

### L-carnosine Loaded on Carboxymethyl Cellulose Hydrogels Promoting Wound Healing

Wei Zhang,<sup>a,†</sup> Xinyi Li,<sup>a,†</sup> Wenjian Chen,<sup>d,†</sup> Xiaoyi Huang,<sup>b,†</sup> Tianfeng Hua,<sup>c</sup> Jinpeng Hu,<sup>a</sup> Jing Zhu,<sup>b</sup> Sheng Ye,<sup>b,\*</sup> Xiaojing Li<sup>a,\*</sup>

<sup>a</sup> Department of Plastic Surgery, The First Affiliated Hospital of Anhui Medical University, Hefei 230022, Anhui, China.

<sup>b</sup> School of Materials and Chemistry, Anhui Agricultural University, Hefei, Anhui 230036, China.

<sup>c</sup> Department of Emergency Surgery & The 2nd Department of Intensive Care Unit, the Second Hospital of Anhui Medical University, Hefei, Anhui 230001, China.

<sup>d</sup> Department of Orthopaedics, Anhui Provincial Children's Hospital, Hefei, Anhui 230022, China

\* Correspondence: sye503@ahau.edu.cn (S.Y.); ay\_lxj@yahoo.com (X.L.)

† These authors contributed equally to this work.



**Figure S1.** Hydrogel samples with different ratios by mixing (A) 5 mg, (B) 6 mg, and (C) 7 mg of CMC hydrogel separately with 200  $\mu$ L of CRN solution in test tubes.



**Figure S2.** Frequency sweep test of the CMC hydrogel.



**Figure S3.** The mass remaining ratios of CMC hydrogel and CRN@hydrogel after swelling experiments.  
\*\*\*P < 0.001.



**Figure S4.** Hemolysis ratio of red blood cells incubated with CRN@hydrogel and the photographs of red blood cells after centrifugation in set. \* $P < 0.05$ , \*\* $P < 0.01$  and \*\*\* $P < 0.001$ . ns represents no significant difference.



**Figure S5.** Wound healing process of treated rats with normal saline, hydrogel and CRN@hydrogel within 12 days of the incision model.



**Figure S6.** The incision wound closure rates of CRN@hydrogel, hydrogel and control groups on postoperative days 3, 6, 9 and 12. \*\*\*P < 0.001, +++ represents a statistically significant difference (p < 0.001) when compared to the wound closure rate of the same group on the third day, ### and ## represent statistically significant differences (p < 0.001 and p < 0.01 , respectively) when compared to the wound closure rate of the same group on the sixth day, &&& and && represent statistically significant differences (p < 0.001 and p < 0.01 , respectively) when compared to the wound closure rate of the same group on the ninth day.



**Figure S7.** (A) Representative images of hematoxylin and eosin staining of CRN@hydrogel, hydrogel and control groups on postoperative day 14. (B) Representative images of Masson's trichromatic staining of CRN@hydrogel, hydrogel and control groups on postoperative day 14. The black arrows indicate skin appendages.



**Figure S8.** (A) Absorption curves of different concentrations of CRN. (B) Drawing of the standard curve of CRN.



**Figure S9.** Ultraviolet analysis of the degradation product of the CMC hydrogel.
